# Supplementary material for: Dynamic change of the systemic immune inflammation index predicts the prognosis of patients with hepatocellular carcinoma after curative resection
Source: publisher site journal article supplement (doi:10.1515/cclm-2015-1191), 2016-03-24
Supplement: Supplementary file 1 [file cclm-2015-1191_suppl.docx]

**Supplemental Data: DOI: 10.1515/cclm-2015-11091**

| **Supplemental Table1 The correlation between clinicopathologic characteristics and dynamic change of the SII.** | | | | |
| --- | --- | --- | --- | --- |
|  | Number (n=163) | Favorable  (n = 107) | Unfavorable  (n = 56) | p-Value |
| Age |  |  |  | 0.489 |
| ≤50 | 55 | 34 | 21 |  |
| ＞50 | 108 | 73 | 35 |  |
| Sex |  |  |  | 0.800 |
| Female | 20 | 13 | 7 |  |
| Male | 143 | 98 | 45 |  |
| HBsAg |  |  |  | 0.137 |
| Negative | 13 | 6 | 7 |  |
| Positive | 150 | 101 | 49 |  |
| Child-Pugh score |  |  |  | 1.000 |
| A | 159 | 104 | 55 |  |
| B | 4 | 3 | 1 |  |
| ALT，U/L |  |  |  | 0.152 |
| ≤75 | 148 | 100 | 48 |  |
| ＞75 | 15 | 7 | 8 |  |
| AFP, ng/mL |  |  |  | 0.211 |
| ≤400 | 113 | 78 | 35 |  |
| ＞400 | 50 | 29 | 21 |  |
| Tumor number |  |  |  | 1.000 |
| Single | 128 | 84 | 44 |  |
| Multiple | 35 | 23 | 12 |  |
| Tumor encapsulation |  |  |  | 0.176 |
| Complete | 63 | 37 | 26 |  |
| None | 100 | 70 | 30 |  |
| Satellite lesions |  |  |  | 0.242 |
| No | 149 | 100 | 49 |  |
| Yes | 14 | 7 | 7 |  |
| Vascular invasion |  |  |  | 0.585 |
| No | 116 | 78 | 38 |  |
| Yes | 47 | 29 | 18 |  |
| BCLC stage |  |  |  | 0.338 |
| 0+A | 124 | 84 | 40 |  |
| B+C | 39 | 23 | 16 |  |
|  |  |  |  |  |

| Supplemental Table 2 Area under the ROC curve. | | | | | | |
| --- | --- | --- | --- | --- | --- | --- |
|  |  |  |  | Asymptotic 95%Confidence Interval | | |
| Test result variables | Area | Std. error | Asymptotic Sig. | | Lower bound | Upper bound |
| Dynamic change of the SII | 0.643 | 0.046 | 0.003 | 0.552 | | 0.733 |
| SII+AFP | 0.636 | 0.045 | 0.004 | 0.548 | | 0.724 |
| SII | 0.609 | 0.047 | 0.021 | 0.517 | | 0.701 |
| AFP | 0.592 | 0.047 | 0.052 | 0.499 | | 0.684 |
| HBsAg | 0.523 | 0.047 | 0.631 | 0.431 | | 0.614 |
| HBeAg | 0.510 | 0.047 | 0.826 | 0.418 | | 0.603 |
| Child-Pugh score | 0.507 | 0.047 | 0.877 | 0.414 | | 0.600 |
| Liver cirrhosis | 0.558 | 0.046 | 0.216 | 0.468 | | 0.648 |
| ALT | 0.534 | 0.048 | 0.469 | 0.440 | | 0.628 |
| Tumor number | 0.558 | 0.048 | 0.223 | 0.464 | | 0.651 |
| Tumor size | 0.640 | 0.046 | 0.003 | 0.550 | | 0.730 |
| Tumor encapsulation | 0.444 | 0.047 | 0.238 | 0.352 | | 0.537 |
| Satellite lesions | 0.552 | 0.048 | 0.268 | 0.458 | | 0.646 |
| Vascular invasion | 0.526 | 0.047 | 0.576 | 0.433 | | 0.619 |
| BCLC stage | 0.591 | 0.048 | 0.053 | 0.498 | | 0.685 |
